# Supplementary material for: Apoptosis Effect of Girinimbine Isolated fromMurraya koenigiion Lung Cancer CellsIn Vitro
Source: Hindawi journal article supplement (doi:10.1155/2013/689865), 2013-01-01

PDA Ch1 220nm 4nm  
mAU

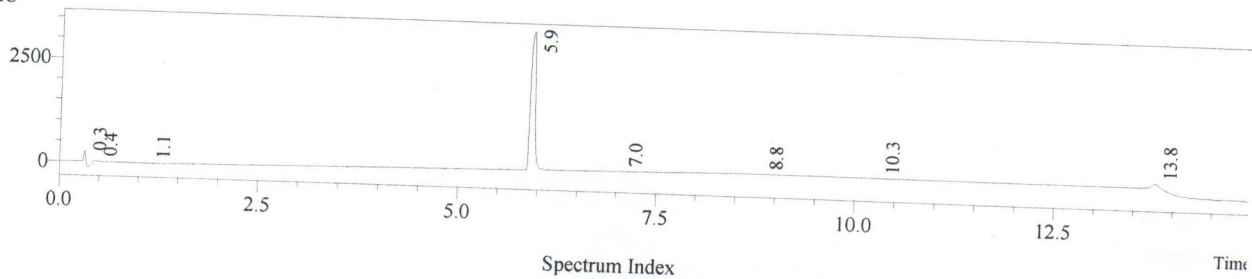

PDA Ch2 254nm 4nm  
mAU

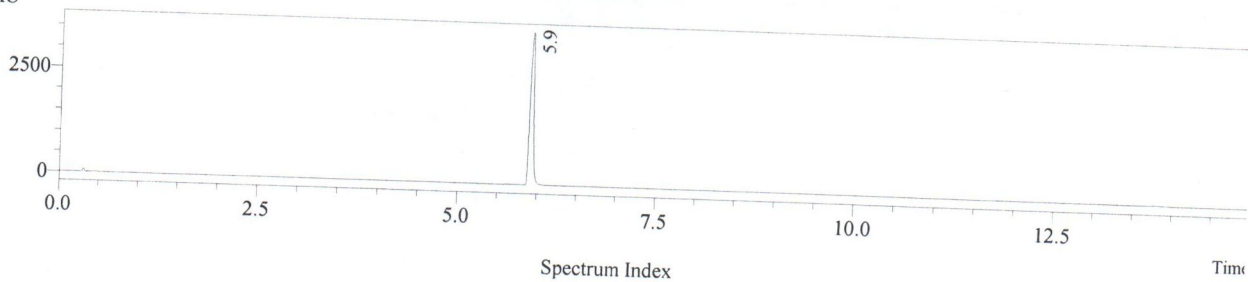

PDA Ch3 350nm 4nm  
mAU

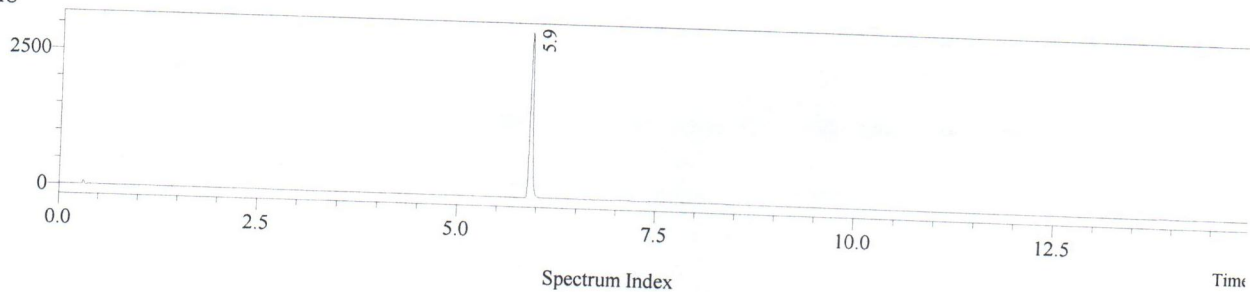

PDA Ch4 450nm 4nm  
mAU

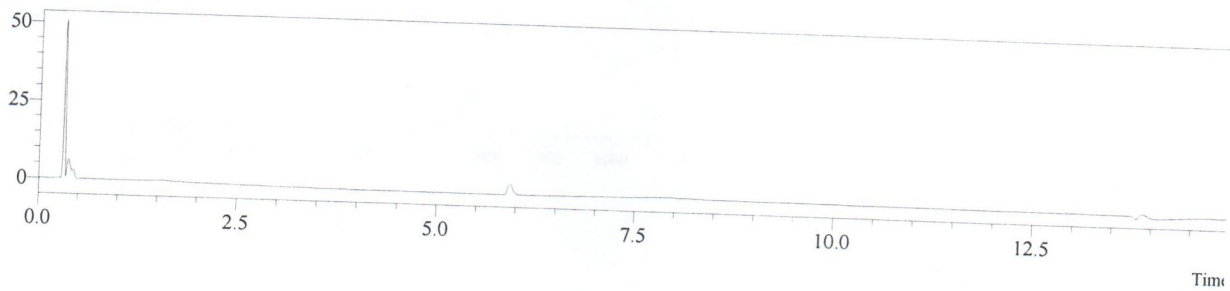

Supplement: f1 [file 689865.f1.pdf]
